# Accurate De Novo Prediction of Protein Contact Map by Ultra-Deep Learning Model

Sheng Wang, Siqi Sun, Zhen Li, Renyu Zhang and Jinbo Xu\*

Toyota Technological Institute at Chicago

[jinboxu@gmail.com](mailto:jinboxu@gmail.com)

\*: corresponding author

The first two authors contribute equally

## Abstract

**Motivation:** Protein contacts contain key information for the understanding of protein structure and function and thus, contact prediction from sequence is an important problem. Recently exciting progress has been made on this problem, but the predicted contacts for proteins without many sequence homologs is still of low quality and not extremely useful for de novo structure prediction.

**Method:** This paper presents a new deep learning method that predicts contacts by integrating both evolutionary coupling (EC) and sequence conservation information through an ultra-deep neural network formed by two deep residual neural networks. The first residual network conducts a series of 1-dimensional convolutional transformation of sequential features; the second residual network conducts a series of 2-dimensional convolutional transformation of pairwise information including output of the first residual network, EC information and pairwise potential. By using very deep residual networks, we can model very complex relationship between sequence and contact map as well as long-range interdependency between contacts and thus, obtain high-quality contact prediction.

**Results:** Our method greatly outperforms existing contact prediction methods and leads to much more accurate contact-assisted protein folding. Tested on the 105 CASP11 targets, 76 CAMEO test proteins and 398 membrane proteins, the average top L long-range prediction accuracy obtained our method, the representative EC method CCMpred and the CASP11 winner MetaPSICOV is 0.47, 0.21 and 0.30, respectively; the average top L/10 long-range accuracy of our method, CCMpred and MetaPSICOV is 0.77, 0.47 and 0.59, respectively. Ab initio folding using our predicted contacts as restraints can yield correct folds (i.e., TMscore>0.6) for 203 of the 579 test proteins, while that using MetaPSICOV- and CCMpred-predicted contacts can do so for only 79 and 62 of them, respectively. Further, our contact-assisted models also have much better quality than template-based models (especially for membrane proteins). Using our predicted contacts as restraints, we can (ab initio) fold 208 of the 398 membrane proteins with TMscore>0.5. By contrast, when the training proteins of our method are used as templates, homology modeling can only do so for 10 of them. One interesting finding is that even if we do not train our prediction models with any membrane proteins, our method works very well on membrane protein contact prediction. In the recent blind CAMEO benchmark, our method successfully folded one mainly-beta protein of 182 residues with a novel fold.

**Availability:** <http://raptorx.uchicago.edu/ContactMap/>

## Author Summary

Protein contact prediction from sequence alone is an important problem. Recently exciting progress has been made on this problem due to the development of direct evolutionary coupling (EC). However, direct EC analysis methods are effective on only some proteins with a very large number (>1000) of

sequence homologs. To further improve contact prediction, we borrow ideas from the latest breakthrough of deep learning. Deep learning is a powerful machine learning technique and has recently revolutionized object recognition, speech recognition and the GO game. We have developed a new deep learning method that predicts contacts by integrating both evolutionary coupling (EC) and sequence conservation information through an ultra-deep neural network, which can model very complex relationship between sequence and contact map as well as long-range interdependency between contacts.

Our test results suggest that deep learning can also revolutionize protein contact prediction. Tested on 398 membrane proteins, the L/10 long-range accuracy obtained by our method is 77.6% while that by the state-of-the-art methods CCMpred and MetaPSICOV is 51.8% and 61.2%, respectively. Ab initio folding using our predicted contacts as restraints can generate much better 3D structural models than the other contact prediction methods. In particular, our predicted contacts yield correct folds for 203 of the 579 test proteins, while MetaPSICOV- and CCMpred can do so for only 79 and 62 of them, respectively. Finally, our contact-assisted models also have much better quality than template-based models (TBM) built from the training proteins. For example, our contact-assisted models have TMscore>0.5 for 208 of the 398 membrane proteins while the TBMs have TMscore >0.5 for only 10 of them. We also find out that even without using any membrane proteins to train our deep learning models, our method still performs very well on membrane protein contact prediction. Recent blind test of our method in CAMEO shows that our method successfully folded a mainly-beta protein of 182 residues.

## Introduction

De novo protein structure prediction from sequence alone is one of most challenging problems in computational biology. Recent progress has indicated that some correctly-predicted long-range contacts may allow accurate topology-level structure modeling (Kim, et al., 2014) and that direct evolutionary coupling (EC) analysis of multiple sequence alignment (MSA) (de Juan, et al., 2013) may reveal some long-range native contacts for proteins with a large number of sequence homologs (Ma, et al., 2015). Therefore, contact prediction and contact-assisted protein folding has recently gained much attention in the community. However, for many proteins especially those without many sequence homologs, the predicted contacts by the state-of-the-art predictors such as CCMpred (Seemayer, et al., 2014), PSICOV (Jones, et al., 2012), Evfold (Marks, et al., 2011), MetaPSICOV (Jones, et al., 2015) and CoinDCA (Wang, et al., 2016) are still of low quality and insufficient for accurate contact-assisted protein folding (Adhikari, et al., 2015). This motivates us to develop a better contact prediction method, especially for proteins without a large number of sequence homologs. In this paper we say two residues form a contact if they are spatially proximal in the native structure, i.e., the Euclidean distance of their C<sub>β</sub> atoms less than 8Å (Di Lena, et al., 2012).

Existing contact prediction methods roughly belong to two categories: evolutionary coupling (EC) analysis and supervised machine learning. EC analysis predicts contacts by identifying co-evolved residues in a protein, such as EVfold (Marks, et al., 2011), PSICOV (Jones, et al., 2012), CCMpred (Seemayer, et al., 2014), Gremlin (Kamisetty, et al., 2013), and others (Ekeberg, et al., 2013; Göbel, et al., 1994; Morcos, et al., 2011). However, EC analysis usually needs a large number of sequence homologs to be effective (Ma, et al., 2015; Skwark, et al., 2014). Supervised machine learning predicts contacts from a variety of evolutionary and co-evolutionary information, e.g., SVMSEQ (Wu and Zhang, 2008), CMAPpro (Di Lena, et al., 2012), PconsC2 (Skwark, et al., 2014), MetaPSICOV (Jones,

et al., 2015), PhyCMAP (Wang and Xu, 2013) and CoinDCA-NN (Ma, et al., 2015). Meanwhile, PconsC2 uses a 5-layer supervised learning architecture (Skwark, et al., 2014); CoinDCA-NN and MetaPSICOV employ a 2-layer neural network (Jones, et al., 2015). CMAPpro uses a neural network with more layers, but its performance saturates at about 10 layers. Some supervised methods such as MetaPSICOV and CoinDCA-NN outperform unsupervised EC analysis on proteins without many sequence homologs, but their performance is still limited by their shallow architectures.

To further improve supervised learning methods for contact prediction, we borrow ideas from very recent breakthrough in computer vision. In particular, we have greatly improved contact prediction by developing a brand-new deep learning model called residual neural network (He, et al., 2015) for contact prediction. Deep learning is a powerful machine learning technique that has revolutionized image classification (Krizhevsky and Hinton, 2010; Srivastava, et al., 2015) and speech recognition (Hinton, et al., 2012). In 2015, ultra-deep residual neural networks (LeCun, et al., 2015) demonstrated superior performance in several computer vision challenges (similar to CASP) such as image classification (Krizhevsky, et al., 2012) and object recognition (Szegedy, et al., 2015). If we treat a protein contact map as an image, then protein contact prediction is kind of similar to (but not exactly same as) pixel-level image labeling, so some techniques effective for image labeling may also work for contact prediction. However, there are also some important differences between image labeling and contact prediction. First, in computer vision community, image-level labeling (i.e., classification of a single image) has been extensively studied, but there are much fewer studies on pixel-level image labeling (i.e., classification of an individual pixel). Second, in many image classification scenarios, image size is resized to a fixed value, but we cannot resize a contact map since we need to do prediction for each residue pair (equivalent to an image pixel). Third, contact prediction has much more complex input features (including both sequential and pairwise features) than image labeling. Fourth, the ratio of contacts in a protein is very small (<10%). That is, the number of positive and negative labels in contact prediction is extremely unbalanced.

In this paper we present a very deep residual neural network for contact prediction. Such a network can capture very complex sequence-contact relationship and long-range interdependency between contacts of a protein. We train this deep neural network using a subset of proteins with solved structures and then test its performance on public data including the CASP (Moult, et al., 2014; Moult, et al., 2016) and CAMEO (Haas, et al., 2013) test proteins as well as membrane proteins. Our experimental results show that our method obtains much better prediction accuracy than existing methods and also result in much more accurate contact-assisted 3D structure modeling. The deep learning method described in this manuscript will also be useful for the prediction of protein-protein and protein-RNA interfacial contacts.

## Results

### Deep learning model for contact prediction

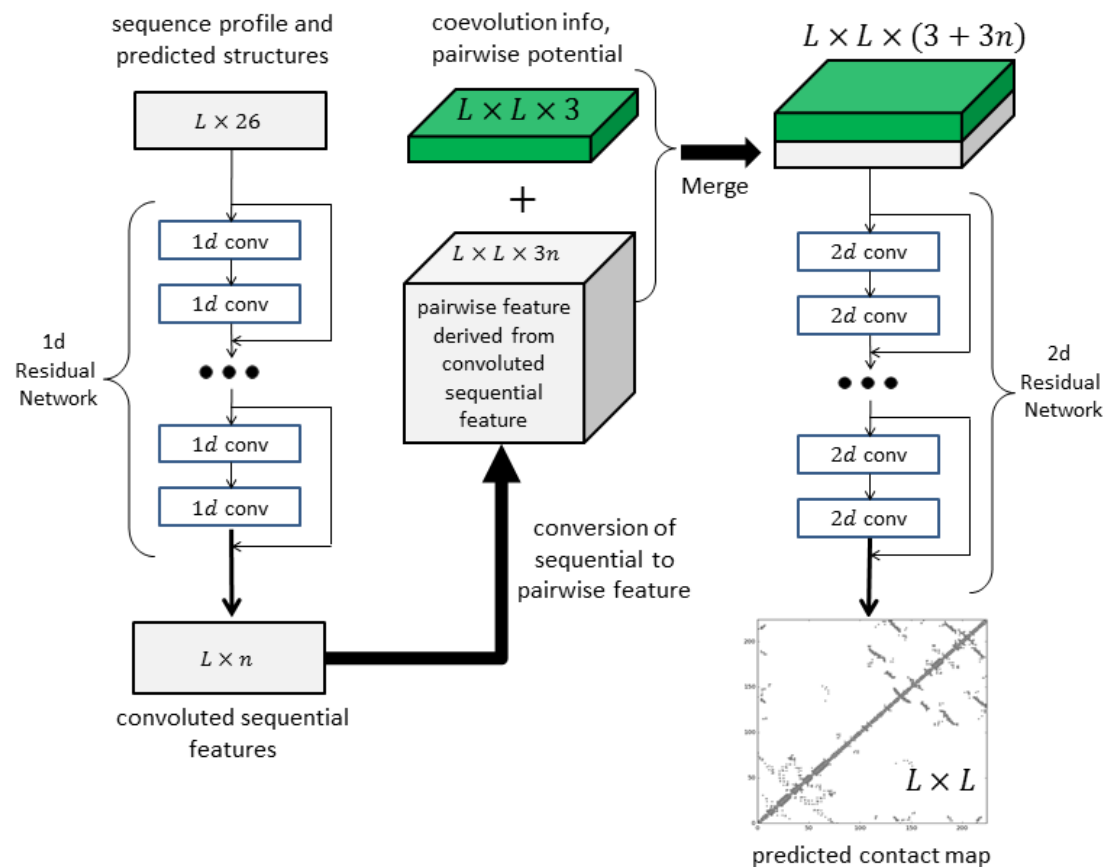

**Figure 1.** Illustration of our deep learning model for contact prediction. Meanwhile,  $L$  is the sequence length of one protein under prediction.

Figure 1 illustrates our deep neural network model for contact prediction (Pinheiro and Collobert, 2014). Different from previous supervised learning approaches for contact prediction that employ only a small number of hidden layers (i.e., a shallow architecture) (LeCun, et al., 2015), our deep neural network employs dozens of hidden layers. By using a very deep architecture, our model can automatically learn the complex relationship between sequence information and contacts and also implicitly model the interdependency among contacts and thus, improve contact prediction (Skwark, et al., 2014). Our model consists of two major modules, each being a residual neural network. The first module conducts a series of 1-dimensional (1D) convolutional transformations of sequential features (sequence profile, predicted secondary structure and solvent accessibility). The output of this 1D convolutional network is converted to a 2-dimensional (2D) matrix by an operation similar to outer product and then fed into the 2<sup>nd</sup> module together with pairwise features (i.e., co-evolution information, pairwise contact and distance potential). The 2<sup>nd</sup> module is a 2D residual network that conducts a series of 2D convolutional transformations of its input. Finally, the output of the 2D convolutional network is fed into a logistic regression, which predicts the probability of any two residues form a contact. In addition, each convolutional layer is also preceded by a simple nonlinear transformation called rectified linear unit (Nair and Hinton, 2010). The output of each 1D convolutional layer has dimension  $L \times m$  where  $L$  is protein sequence length and  $m$  is the number of hidden neurons at one residue. The output of

a 2D convolutional layer has dimension  $L \times L \times n$  where  $n$  is the number of hidden neurons for one residue pair. The number of hidden neurons may vary at each layer.

We tested our method using the 150 Pfam families described in (Jones, et al., 2012), the 105 CASP11 test proteins (Monastyrskyy, et al., 2015), 398 membrane proteins (Supplementary Table 1) and 76 hard CAMEO test proteins released from 10/17/2015 to 04/09/2016 (Supplementary Table 2). The tested methods also include PSICOV (Jones, et al., 2012), Evfold (Marks, et al., 2011), CCMpred (Seemayer, et al., 2014), and MetaPSICOV (Jones, et al., 2015). The former three predict contacts using direct evolutionary coupling analysis. CCMpred performs slightly better than PSICOV and Evfold. MetaPSICOV (Jones, et al., 2015) is a supervised learning method that performed the best in CASP11 (Monastyrskyy, et al., 2015). All the programs are run with parameters set according to their respective papers. We cannot evaluate PconsC2 (Skwark, et al., 2014) since we failed to obtain any results from its web server. PconsC2 did not outperform MetaPSICOV in CASP11 (Monastyrskyy, et al., 2015), so it may suffice to just compare our method with MetaPSICOV.

## Overall Performance

We evaluate the accuracy of the top  $L/k$  ( $k=10, 5, 2, 1$ ) predicted contacts where  $L$  is protein sequence length (Ma, et al., 2015). The prediction accuracy is defined as the percentage of native contacts among the top  $L/k$  predicted contacts. We say a contact is short-, medium- and long-range when the sequence distance of the two residues in a contact falls into  $[6, 11]$ ,  $[12, 23]$ , and  $\geq 24$ , respectively.

**Table 1.** Contact prediction accuracy on the 150 Pfam families.

| Method     | Short |      |      |      | Medium |      |      |      | Long |      |      |      |
|------------|-------|------|------|------|--------|------|------|------|------|------|------|------|
|            | L/10  | L/5  | L/2  | L    | L/10   | L/5  | L/2  | L    | L/10 | L/5  | L/2  | L    |
| EVfold     | 0.50  | 0.40 | 0.26 | 0.17 | 0.64   | 0.52 | 0.34 | 0.22 | 0.74 | 0.68 | 0.53 | 0.39 |
| PSICOV     | 0.58  | 0.43 | 0.26 | 0.17 | 0.65   | 0.51 | 0.32 | 0.20 | 0.77 | 0.70 | 0.52 | 0.37 |
| CCMpred    | 0.65  | 0.50 | 0.29 | 0.19 | 0.73   | 0.60 | 0.37 | 0.23 | 0.82 | 0.76 | 0.62 | 0.45 |
| MetaPSICOV | 0.82  | 0.70 | 0.45 | 0.27 | 0.83   | 0.73 | 0.52 | 0.33 | 0.92 | 0.87 | 0.74 | 0.58 |
| Our method | 0.93  | 0.81 | 0.51 | 0.30 | 0.93   | 0.86 | 0.62 | 0.38 | 0.98 | 0.96 | 0.89 | 0.74 |

**Table 2.** Contact prediction accuracy on 105 CASP11 test proteins.

| Method     | Short |      |      |      | Medium |      |      |      | Long |      |      |      |
|------------|-------|------|------|------|--------|------|------|------|------|------|------|------|
|            | L/10  | L/5  | L/2  | L    | L/10   | L/5  | L/2  | L    | L/10 | L/5  | L/2  | L    |
| EVfold     | 0.25  | 0.21 | 0.15 | 0.12 | 0.33   | 0.27 | 0.19 | 0.13 | 0.37 | 0.33 | 0.25 | 0.19 |
| PSICOV     | 0.29  | 0.23 | 0.15 | 0.12 | 0.34   | 0.27 | 0.18 | 0.13 | 0.38 | 0.33 | 0.25 | 0.19 |
| CCMpred    | 0.35  | 0.28 | 0.17 | 0.12 | 0.40   | 0.32 | 0.21 | 0.14 | 0.43 | 0.39 | 0.31 | 0.23 |
| MetaPSICOV | 0.69  | 0.58 | 0.39 | 0.25 | 0.69   | 0.59 | 0.42 | 0.28 | 0.60 | 0.54 | 0.45 | 0.35 |
| Our method | 0.82  | 0.70 | 0.46 | 0.28 | 0.85   | 0.76 | 0.55 | 0.35 | 0.81 | 0.77 | 0.68 | 0.55 |

**Table 3.** Contact prediction accuracy on 76 CAMEO test proteins.

| Method | Short |      |      |      | Medium |      |      |      | Long |      |      |      |
|--------|-------|------|------|------|--------|------|------|------|------|------|------|------|
|        | L/10  | L/5  | L/2  | L    | L/10   | L/5  | L/2  | L    | L/10 | L/5  | L/2  | L    |
| EVfold | 0.17  | 0.13 | 0.11 | 0.09 | 0.23   | 0.19 | 0.13 | 0.10 | 0.25 | 0.22 | 0.17 | 0.13 |
| PSICOV | 0.20  | 0.15 | 0.11 | 0.08 | 0.24   | 0.19 | 0.13 | 0.09 | 0.25 | 0.23 | 0.18 | 0.13 |

|            |      |      |      |      |      |      |      |      |      |      |      |      |
|------------|------|------|------|------|------|------|------|------|------|------|------|------|
| CCMpred    | 0.22 | 0.16 | 0.11 | 0.09 | 0.27 | 0.22 | 0.14 | 0.10 | 0.30 | 0.26 | 0.20 | 0.15 |
| MetaPSICOV | 0.56 | 0.47 | 0.31 | 0.20 | 0.53 | 0.45 | 0.32 | 0.22 | 0.47 | 0.42 | 0.33 | 0.25 |
| Our method | 0.67 | 0.57 | 0.37 | 0.23 | 0.69 | 0.61 | 0.42 | 0.28 | 0.69 | 0.65 | 0.55 | 0.42 |

**Table 4.** Contact prediction accuracy on 398 membrane proteins.

| Method     | Short |      |      |      | Medium |      |      |      | Long |      |      |      |
|------------|-------|------|------|------|--------|------|------|------|------|------|------|------|
|            | L/10  | L/5  | L/2  | L    | L/10   | L/5  | L/2  | L    | L/10 | L/5  | L/2  | L    |
| EVfold     | 0.16  | 0.13 | 0.09 | 0.07 | 0.28   | 0.22 | 0.13 | 0.09 | 0.44 | 0.37 | 0.26 | 0.18 |
| PSICOV     | 0.22  | 0.16 | 0.10 | 0.07 | 0.29   | 0.21 | 0.13 | 0.09 | 0.42 | 0.34 | 0.23 | 0.16 |
| CCMpred    | 0.27  | 0.19 | 0.11 | 0.08 | 0.36   | 0.26 | 0.15 | 0.10 | 0.52 | 0.45 | 0.31 | 0.21 |
| MetaPSICOV | 0.45  | 0.35 | 0.22 | 0.14 | 0.49   | 0.40 | 0.27 | 0.18 | 0.61 | 0.55 | 0.42 | 0.30 |
| Our method | 0.60  | 0.46 | 0.27 | 0.16 | 0.66   | 0.53 | 0.33 | 0.22 | 0.78 | 0.73 | 0.62 | 0.47 |

As shown in Tables 1-4, our method outperforms CCMpred and MetaPSICOV by a very large margin on the 4 test sets regardless of how many top predicted contacts are evaluated and no matter whether the contacts are short-, medium- or long-range. The advantage of our method is the smallest on the 150 Pfam families because many of them have a pretty large number of sequence homologs. In terms of top L long-range contact accuracy on the CASP11 set, our method exceeds CCMpred and MetaPSICOV by 0.32 and 0.20, respectively. On the CAMEO set, our method exceeds CCMpred and MetaPSICOV by 0.27 and 0.17, respectively. On the membrane protein set, our method exceeds CCMpred and MetaPSICOV by 0.26 and 0.17, respectively. Since the Pfam set is relatively easy, we will not present its result any more in the following sections.

### Prediction accuracy with respect to the number of sequence homologs

To examine the performance of our method with respect to the amount of homologous information available for a protein under prediction, we measure the effective number of sequence homologs in multiple sequence alignment (MSA) by  $M_{eff}$  (Wang and Xu, 2013) (see Method for its formula). A protein with a smaller  $M_{eff}$  has fewer non-redundant sequence homologs. We divide all the test proteins into 10 bins according to  $\ln(M_{eff})$  and then calculate the average accuracy of the test proteins in each bin. We merge the first 3 bins for the membrane protein set since they contain a small number of proteins.

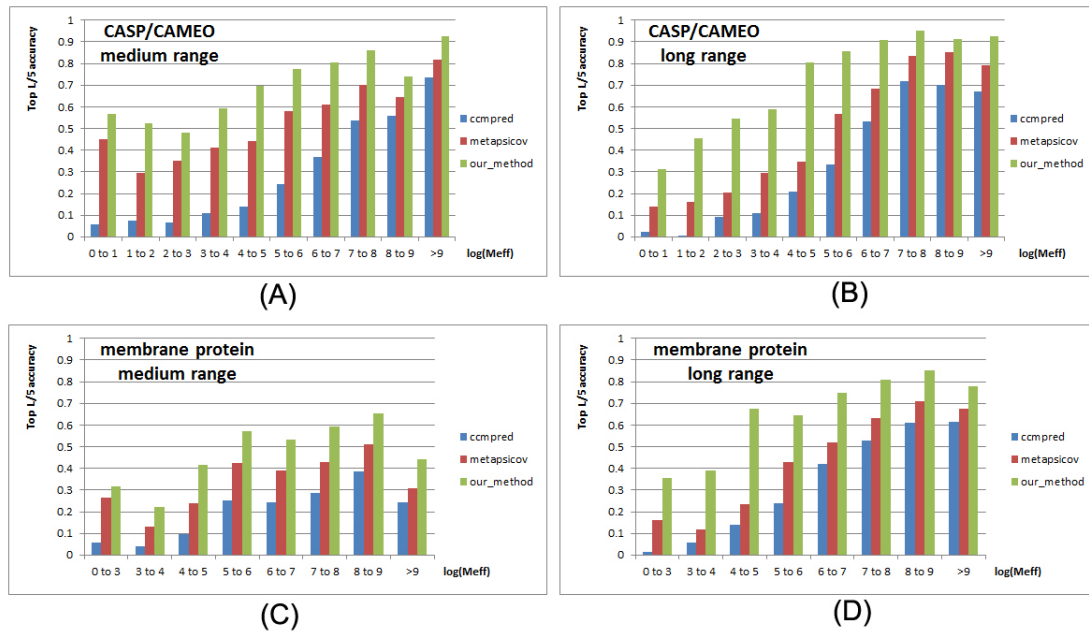

**Figure 2.** Top L/5 accuracy of our method (green), CCMpred (blue) and MetaPSICOV (red) with respect to the amount of homologous information measured by  $\ln(M_{eff})$ . The accuracy on the union of the CASP and CAMEO sets is displayed in (A) medium-range and (B) long-range. The accuracy on the membrane protein set is displayed in (C) medium-range and (D) long-range.

Fig. 2 shows that the top L/5 contact prediction accuracy increases with respect to  $M_{eff}$ , i.e., the amount of homologous information, and that our method outperforms both MetaPSICOV and CCMpred regardless of  $M_{eff}$ . Our long-range prediction accuracy is even better when  $\ln(M_{eff}) \leq 7$  (equivalently  $M_{eff} < 1100$ ), i.e., when the protein under prediction does not have a very large number of non-redundant sequence homologs. Fig. 2 also shows that no matter how many sequence homologs are available, two supervised learning methods (MetaPSICOV and our method) greatly outperform the unsupervised EC analysis method CCMpred.

### Contact-assisted protein folding

One of the important goals of contact prediction is to perform contact-assisted protein folding (Adhikari, et al., 2015). To test if our contact prediction can lead to better 3D structure modeling than the others, we build structure models for all the test proteins using the top predicted contacts as restraints of ab initio folding. For each test protein, we feed the top predicted contacts as restraints into the CNS suite (Bringer, et al., 1998) to generate 3D models. We measure the quality of a 3D model by TMsore (Zhang and Skolnick, 2004), which ranges from 0 to 1, with 0 indicating the worst and 1 the best, respectively.

As shown in Fig. 3, our predicted contacts can generate much better 3D models than CCMpred and MetaPSICOV. On average, the 3D models generated by our method are better than MetaPSICOV and CCMpred by  $\sim 0.12$  TMsore unit and  $\sim 0.15$  unit, respectively. The average TMsore of the top 1 models generated by CCMpred, MetaPSICOV, and our method is 0.333, 0.377, and 0.518, respectively on the CASP dataset. On the CAMEO set, the average TMsore of the top 1 models generated by CCMpred, MetaPSICOV and our method is 0.256, 0.305 and 0.407, respectively. On the membrane protein set, the average TMsore of the top 1 models generated by CCMpred, MetaPSICOV and our



method is 0.354, 0.387, and 0.493, respectively. On the CASP set, the average TMscore of the best of top 5 models generated by CCMpred, MetaPSICOV, and our method is 0.352, 0.399, and 0.543, respectively. On the CAMEO set, the average TMscore of the best of top 5 models generated by CCMpred, MetaPSICOV, and our method is 0.271, 0.334, and 0.431, respectively. On the membrane protein set, the average TMscore of the best of top 5 models generated by CCMpred, MetaPSICOV, and our method is 0.385, 0.417, and 0.516, respectively. In particular, when the best of top 5 models are considered, our predicted contacts can result in correct folds (i.e.,  $TMscore > 0.6$ ) for 203 of the 579 test proteins, while MetaPSICOV- and CCMpred-predicted contacts can do so for only 79 and 62 of them, respectively.

Our method also generates much better contact-assisted models for the test proteins without many non-redundant sequence homologs. When the 219 of 579 test proteins with  $M_{eff} \leq 500$  are evaluated, the average TMscore of the top 1 models generated by our predicted contacts for the CASP11, CAMEO and membrane sets is 0.426, 0.365, and 0.397, respectively. By contrast, the average TMscore of the top 1 models generated by CCMpred-predicted contacts for the CASP11, CAMEO and membrane sets is 0.236, 0.214, and 0.241, respectively. The average TMscore of the top 1 models generated by MetaPSICOV-predicted contacts for the CASP11, CAMEO and membrane sets is 0.292, 0.272, and 0.274, respectively.

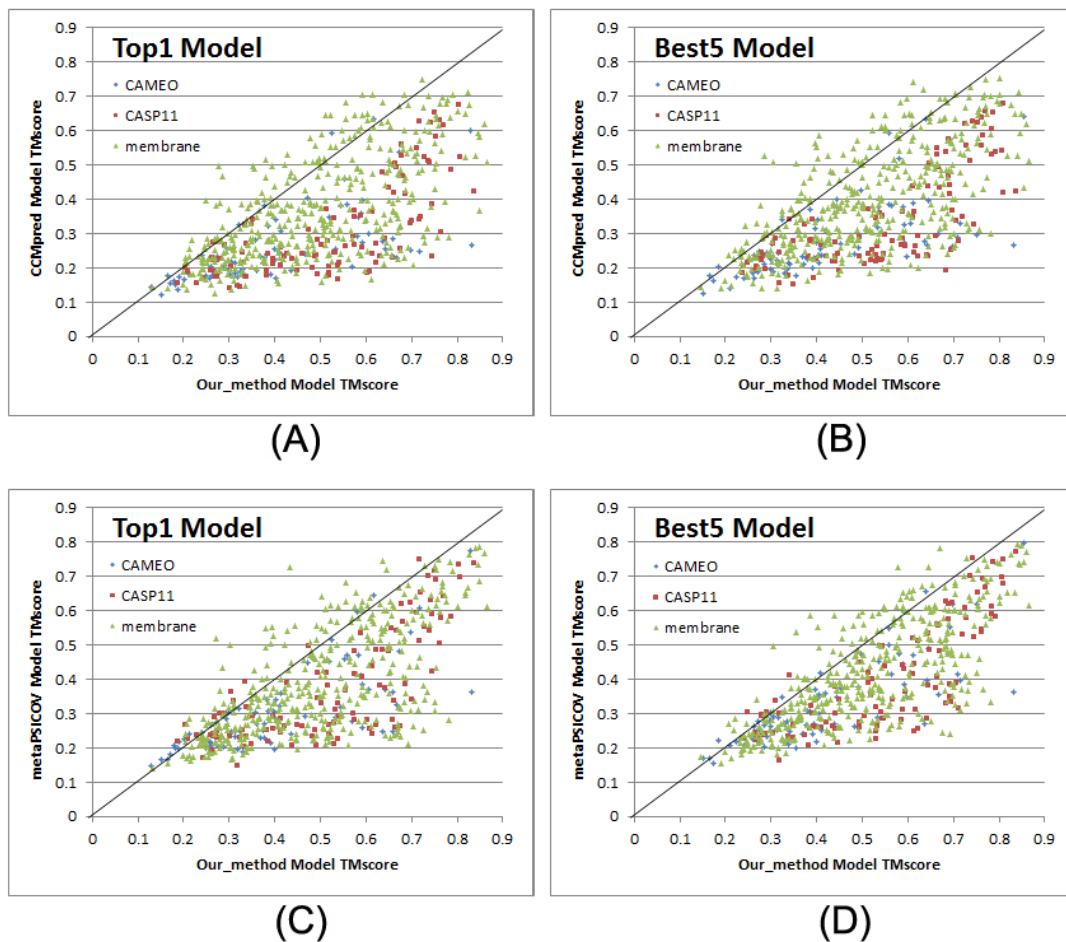

**Figure 3.** Quality comparison (measured by TMscore) of contact-assisted models generated by our method, CCMpred and MetaPSICOV on the 105 CASP11 targets (red square), 76 CAMEO targets



(blue diamond) and 398 membrane protein targets (green triangle), respectively. (A) and (B): comparison of top 1 and the best of top 5 models between our method (X-axis) and CCMpred (Y-axis). (C) and (D): comparison of top 1 and the best of top 5 models between our method (X-axis) and MetaPSICOV (Y-axis).

### Contact-assisted models vs. template-based models

To compare the quality of our contact-assisted models and template-based models (TBMs), we built TBMs for all the test proteins using our training proteins as candidate templates. To generate TBMs for a test protein, we first run HHblits (with the UniProt20\_2016 library) to generate an HMM file for the test protein, then run HHsearch with this HMM file to search for the best templates among the 6767 training proteins, and finally run MODELLER to build a TBM from each of the top 5 templates. Fig. 4 shows the head-to-head comparison between our contact-assisted models and the TBMs on these three test sets. When only the first models are evaluated, our contact-assisted models for the 76 CAMEO test proteins have an average TMscore 0.407 while the TBMs have an average TMscore 0.317. On the 105 CASP11 test proteins, the average TMscore of our contact-assisted models is 0.518 while that of the TBMs is only 0.393. On the 398 membrane proteins, the average TMscore of our contact-assisted models is 0.493 while that of the TBMs is only 0.149. When the best of top 5 models are evaluated, on the 76 CAMEO test proteins, the average TMscore of our contact-assisted models is 0.431 while that of the TBMs is only 0.366. On the 105 CASP11 test proteins, the average TMscore of our contact-assisted models is 0.543 while that of the TBMs is only 0.441. On the 398 membrane proteins, the average TMscore of our contact-assisted models is 0.516 while that of the TBMs is only 0.187. The low quality of TBMs further confirms that there is not much redundancy between our training and test proteins.

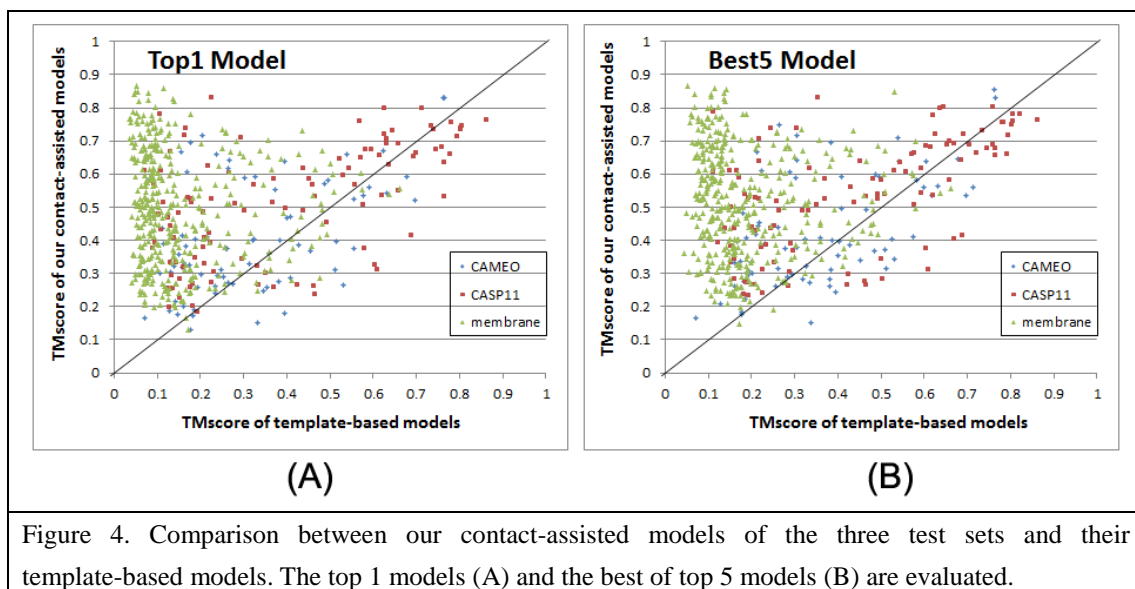

Further, when the best of top 5 models are considered for all the methods, our contact-assisted models have TMscore>0.5 for 24 of the 76 CAMEO test proteins while the TBMs have TMscore>0.5 for only 18 of them. Our contact-assisted models have TMscore >0.5 for 67 of the 105 CASP11 test proteins while the TBMs have TMscore>0.5 for only 44 of them. Our contact-assisted models have TMscore>0.5 for 208 of the 398 membrane proteins while the TBMs have TMscore >0.5 for only 10 of them. Our contact-assisted models for membrane proteins are much better than their TBMs because that of the similarity between the 6767 training proteins and the 398 test membrane proteins is small.

When the 219 test proteins with  $\leq 500$  non-redundant sequence homologs are evaluated, the average TMscore of the TBMs is 0.254 while that of our contact-assisted models is 0.421. Among these 219 proteins, our contact-assisted models have TMscore $>0.5$  for 72 of them while the TBMs have TMscore $>0.5$  for only 17 of them.

The above results imply that 1) when a query protein has no close templates, our contact-assisted modeling may work better than template-based modeling; 2) contact-assisted modeling shall be particularly useful for membrane proteins; and 3) our deep learning model does not predict contacts by simply copying contacts from the training proteins since our predicted contacts may result in much better 3D models than homology modeling.

### Specific examples

**Blind test in CAMEO.** We have implemented our algorithm as a contact prediction web server (<http://raptorx.uchicago.edu/ContactMap/>). In September 2016 we started to blindly test our contact server (ID: server60) through the live benchmark CAMEO (<http://www.cameo3d.org/sp/1-month/>), which every week sends some protein sequences to participating web servers for prediction and then evaluates 3D models collected from servers. The test proteins used by CAMEO have no publicly available native structures until CAMEO finishes collecting models from participating servers. On September 10, 2016, CAMEO has two hard targets for structure prediction. Our contact web server successfully folded the hardest one (CAMEO ID: 2016-09-10\_00000002\_1, PDB ID:2nc8), a mainly-beta protein of 182 residues. Table 5 shows that our server produced a much better contact prediction than the direct evolutionary coupling method CCMpred and the CASP11 winner MetaPSICOV. CCMpred has very low accuracy since HHblits detected only  $\sim 250$  non-redundant sequence homologs for this protein, i.e., its Meff=250. Fig. 5 shows the predicted contact maps and their overlap with the native and that MetaPSICOV fails to predict a large number of long-range contacts.

Table 5. The long- and medium-range contact prediction accuracy of our method, MetaPSICOV and CCMpred on the CAMEO target 2nc8A.

|            | Long-range accuracy |       |       |       | Medium-range accuracy |       |       |       |
|------------|---------------------|-------|-------|-------|-----------------------|-------|-------|-------|
|            | L                   | L/2   | L/5   | L/10  | L                     | L/2   | L/5   | L/10  |
| Our method | 0.764               | 0.923 | 0.972 | 1.0   | 0.450                 | 0.769 | 0.972 | 1.0   |
| MetaPSICOV | 0.258               | 0.374 | 0.556 | 0.667 | 0.390                 | 0.626 | 0.806 | 0.944 |
| CCMpred    | 0.165               | 0.231 | 0.389 | 0.333 | 0.148                 | 0.187 | 0.167 | 0.222 |

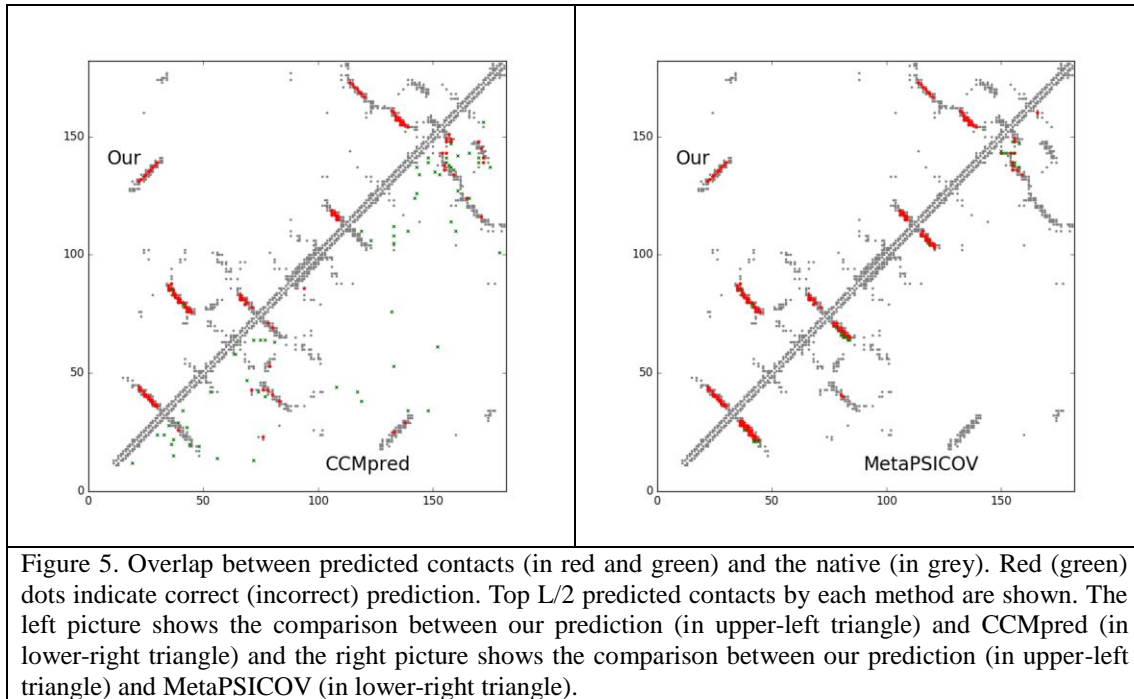

The 3D model submitted by our contact server has TMscore 0.570 (As of September 16, 2016, our sever submits only one 3D model for each test protein) and the best of our top 5 models has TMscore 0.612 and RMSD 6.5Å. By contrast, the best TMscore obtained by the other CAMEO-participating servers is only 0.47 (Supplemental Fig. S1). Three top-notch servers HHpred (homology modeling), RaptorX (template-based modeling) and Robetta (template-based and ab initio folding) only submitted models with  $TMscore \leq 0.30$ . The best of top 5 models built by CNS from CCMpred- and MetaPSICOV-predicted contacts have TMscore 0.206 and 0.307, respectively, and RMSD 15.8Å and 14.2Å, respectively. According to Xu and Zhang (Xu and Zhang, 2010), a 3D model with  $TMscore < 0.5$  is unlikely to have a correct fold while a model with  $TMscore \geq 0.6$  surely has a correct fold. That is, our contact server predicted a correct fold for this test protein while the others failed to. Fig. 6 shows that the beta strands of our predicted model (red) matches well with the native (blue).

This test protein represents a novel fold. Our in-house structural homolog search tool DeepSearch (Wang, et al., 2013) cannot identify structurally similar proteins in PDB70 (created right before September 10, 2016) for this test protein. PDB70 is a set of representative structures derived from clustering all the proteins in PDB by 70% sequence identity. Two top-ranked proteins by DeepSearch are 4kx7A and 4g2aA, which have TMscore 0.521 and 0.535 with the native structure of the test protein, respectively, and TMscore 0.465 and 0.466 with our best model, respectively. We cannot find structurally similar proteins in PDB70 for our best model either; the best TMscore between PDB70 and our best model is only 0.480. These results are consistent with the fact that none of the template-based

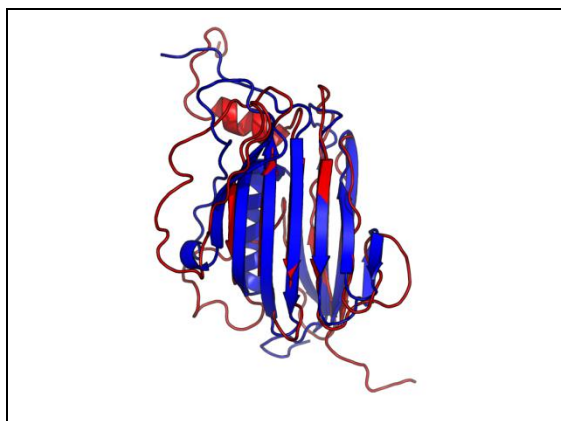

Figure 6. Superimposition between our predicted model (red) and its native structure (blue) for the CAMEO test protein (PDB ID 2nc8 and chain A).

These results are consistent with the fact that none of the template-based

servers in CAMEO submitted a model with TMscore>0.5 for this test protein. All these studies suggest that the models predicted by our method are not simply copied from the solved structures in PDB, and that our method can indeed fold a relatively large beta protein with a novel fold.

**Non-blind test cases.** Here we show the predicted contacts and contact-assisted models of two specific proteins Sin3a (PDB id: 2n2hB) and GP1 (PDB id: 4zjfA). Sin3a is a mainly-alpha protein consisting of two long and paired amphipathic helix (Clark, et al., 2015). The contact map predicted by our method has L/2 long-range accuracy 0.78 while that by MetaPSICOV has L/2 accuracy 0.35. As shown in the lower-right triangle of Fig. 7(A), MetaPSICOV fails to predict the contacts between the paired amphipathic helices. As shown in Fig. 7(C), the contact-assisted model built from MetaPSICOV-predicted contacts has TMscore only 0.359. By contrast, the model built from our predicted contacts has TMscore 0.591.

GP1 is the receptor binding domain of Lassa virus. It has a central  $\beta$ -sheet sandwiched (with 5 beta strands numbering from 1, 2, 7, 4, and 3) by the N and C termini on one side and an array of  $\alpha$ -helices and loops on the other (Cohen-Dvashi, et al., 2015). The key to form this fold lies in the placement of beta7 between beta3 and beta4, which are shown in the contact map around residue pairs (150, 40) and (150, 100). As shown in the upper-right triangle of Fig. 7(B), our method successfully predicts these contacts and has L/2 long-range contact accuracy 0.72. The 3D model built from our contacts has TMscore 0.491, as shown in the right picture of Fig. 7(D). On the contrary, MetaPSICOV predicts few contacts in these regions and its L/2 long-range accuracy is only 0.32. The 3D model built from the MetaPSICOV-predicted contacts has TMscore only 0.246, as shown in the left of Fig. 7(D).

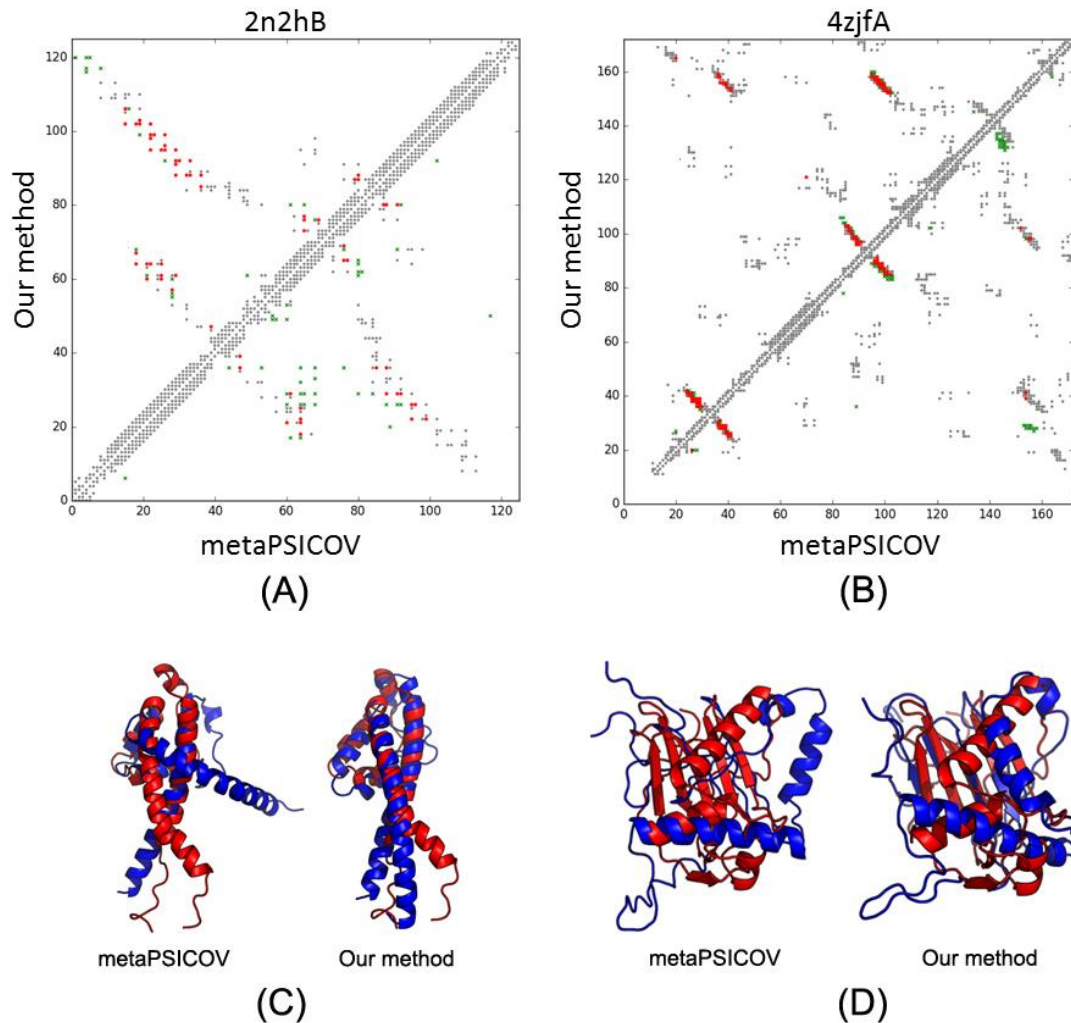

**Figure 7.** The predicted contact maps and contact-assisted 3D models by MetaPSICOV and our method for two proteins: 2n2hB and 4zjfA. (A) and (B) show the contact maps, in which the upper-left and lower-right triangles display the top  $L/2$  predicted contacts by our method and MetaPSICOV, respectively. Meanwhile, grey dots represent native contacts, while red (green) represents correct (incorrect) predictions. (C) and (D) show the contact-assisted models (blue) and native structures (red).

## Conclusion and Discussion

In this paper we have presented a new deep (supervised) learning method for protein contact prediction. Our method distinguishes itself from previous supervised learning methods in that our model employs a combination of two deep residual neural networks to model sequence-contact relationship, one for modeling of sequential features (i.e., sequence profile, predicted secondary structure and solvent accessibility) and the other for modeling of pairwise features (e.g., coevolution information). Ultra-deep residual network is the latest breakthrough in computer vision and has demonstrated the best performance in the computer vision challenge tasks (similar to CASP) in 2015. Our method is also unique in that we model a contact map as an individual image and then conduct pixel-level labeling on the whole image, which allows us to take into consideration correlation among multiple sequentially-distant residue pairs. By contrast, existing supervised learning methods predict if two residues form a contact or not independent of the other residue pairs. Our experimental results show that our method dramatically improves contact prediction, exceeding currently the best methods (e.g., CCMpred, Evfold, PSICOV and MetaPSICOV) by a very large margin. Ab initio folding using our

predicted contacts as restraints can also yield much better 3D structural models than the contacts predicted by the other methods. Further, our experimental results also show that our contact-assisted models are much better than template-based models built from the training proteins of our contact prediction model. We expect that our contact prediction methods can help reveal much more biological insights for those protein families without solved structures and close structural homologs.

An interesting finding is that although our training set contains only around 100 membrane proteins, our model works well for membrane proteins, much better than CCMpred and MetaPSICOV. We further trained several new models without using any membrane proteins in our training set. Our experimental result shows that these new models have almost the same accuracy on membrane proteins as those trained with membrane proteins. This result implies that the sequence-structure relationship learned by our model from globular proteins can be transferred to membrane protein contact prediction. We are going to study if we can further improve contact prediction accuracy of membrane proteins by including many more membrane proteins in the training set.

We may further improve prediction accuracy by enlarging the training set. For example, if we use more training proteins by relaxing the BLAST E-value cutoff to 0.001 or without using it at all, we may improve the top L/k (k=1,2,5,10) contact prediction accuracy by 1-3% and accordingly the quality of the resultant 3D models by 0.01-0.02 in terms of TMscore. It might also be likely to improve the 3D model quality by using Rosetta to build 3D models from predicted contacts. Compared to the CNS suite, Rosetta makes use of more local structural restraints through fragment assembly and thus, might result in better 3D models.

Our model achieves pretty good performance when using around 60-70 convolutional layers. A natural question to ask is can we further improve prediction accuracy by using many more convolutional layers? In computer vision, it has been shown that a 1001-layer residual neural network can yield better accuracy for image-level classification than a 100-layer network (but no result on pixel-level labeling is reported). Currently we cannot apply more than 100 layers to our model due to insufficient memory of a GPU card (12G). We plan to overcome the memory limitation by extending our training algorithm to run on multiple GPU cards. Then we will train a model with hundreds of layers to see if we can further improve prediction accuracy or not.



## Method

### Deep learning model details

**Residual network blocks.** Our network consists of two residual neural networks, each in turn consisting of some residual blocks concatenated together. Fig. 6 shows an example of a residual block consisting of 2 convolution layers and 2 activation layers. In this figure,  $X_i$  and  $X_{i+1}$  are the input and output of the block, respectively. The activation layer conducts a simple nonlinear transformation of its input without using any parameters. Here we use the ReLU activation function (Nair and Hinton, 2010) for such a transformation. Let  $f(X_i)$  denote the result of  $X_i$  going through the two activation layers and the two convolution layers. Then,  $X_{i+1}$  is equal to  $X_i + f(X_i)$ . That is,  $X_{i+1}$  is a combination of  $X_i$  and its nonlinear transformation. Since  $f(X_i)$  is equal to the difference between  $X_{i+1}$  and  $X_i$ ,  $f$  is called residual function and this network called residual network. In the first residual network,  $X_i$  and  $X_{i+1}$  represent sequential features and have dimension  $L \times n_i$  and  $L \times n_{i+1}$ , respectively, where  $L$  is protein sequence length and  $n_i$  ( $n_{i+1}$ ) can be interpreted as

the number of features or hidden neurons at each position (i.e., residue). In the 2<sup>nd</sup> residual network,  $X_i$  and  $X_{i+1}$  represent pairwise features and have dimension  $L \times L \times n_i$  and  $L \times L \times n_{i+1}$ , respectively, where  $n_i$  ( $n_{i+1}$ ) can be interpreted as the number of features or hidden neurons at one position (i.e., residue pair). Typically, we enforce  $n_i \leq n_{i+1}$  since one position at a higher level is supposed to carry more information. When  $n_i < n_{i+1}$ , in calculating  $X_i + f(X_i)$  we shall pad zeros to  $X_i$  so that it has the same dimension as  $X_{i+1}$ . To speed up training, we also add a batch normalization layer (Ioffe and Szegedy, 2015) before each activation layer, which normalizes its input to have mean 0 and standard deviation 1. The filter size (i.e., window size) used by a 1D convolution layer is 17 while that used by a 2D convolution layer is  $3 \times 3$  or  $5 \times 5$ . By stacking many residual blocks together, even if at each convolution layer we use a small window size, our network can model very long-range interdependency between input features and contacts as well as the long-range interdependency between two different residue pairs. We fix the depth (i.e., the number of convolution layers) of the 1D residual network to 6, but vary the depth of the 2D residual network. Our experimental results show that with ~60 hidden neurons at each position and ~60 convolution layers for the 2<sup>nd</sup> residual network, our model can yield pretty good performance. Note that it has been shown that for image classification a convolutional neural network with a smaller window size but many more layers usually outperforms a network with a larger window size but fewer layers. Further, a 2D convolutional neural network with a smaller window size also has a smaller number of parameters than a network with a larger window size.

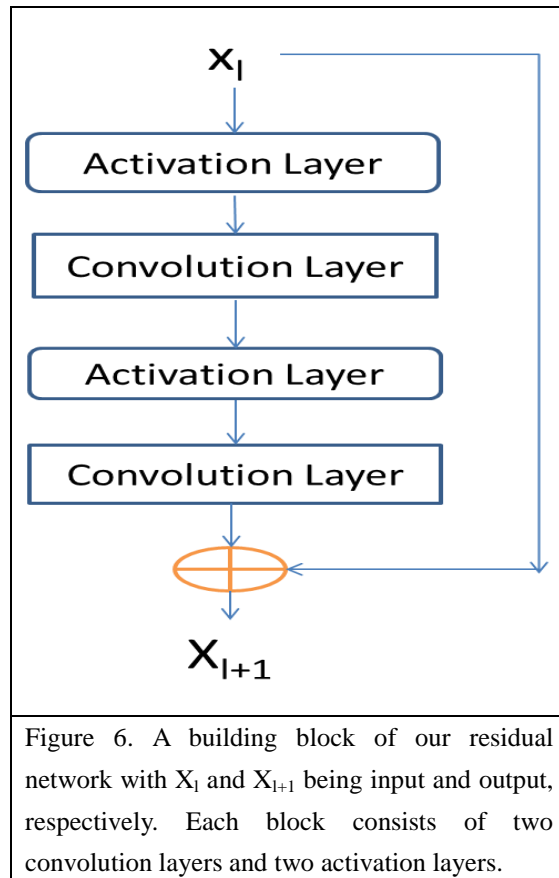

Figure 6. A building block of our residual network with  $X_i$  and  $X_{i+1}$  being input and output, respectively. Each block consists of two convolution layers and two activation layers.

Our deep learning method for contact prediction is unique in at least two aspects. First, our model



employs two multi-layer residual neural networks, which have not been applied to contact prediction before. Residual neural networks can pass both linear and nonlinear information from end to end (i.e., from the initial input to the final output). Second, we do contact prediction on the whole contact map by treating it as an individual image. In contrast, previous supervised learning methods separate the prediction of one residue pair from the others. By doing contact prediction simultaneously for all the residue pairs of one protein sequence, we can easily model the long-range interdependency between two residue pairs and the long-range relationship between one contact and input features.

**Conversion of sequential features to pairwise features.** We convert the output of the first module of our model (i.e., the 1-d residual neural network) to a 2D representation using an operation similar to outer product. Simply speaking, let  $v = \{v_1, v_2, \dots, v_i, \dots, v_L\}$  be the final output of the first module where  $L$  is protein sequence length and  $v_i$  is a feature vector storing the output information for residue  $i$ . For a pair of residues  $i$  and  $j$ , we concatenate  $v_i$ ,  $v_{(i+j)/2}$  and  $v_j$  to a single vector and use it as one input feature of this residue pair. The input features for this pair also include mutual information, the EC information calculated by CCMpred and pairwise contact potential (Betancourt and Thirumalai, 1999; Miyazawa and Jernigan, 1985).

**Loss function.** We use maximum-likelihood method to train model parameters. That is, we maximize the occurring probability of the native contacts (and non-contacts) of the training proteins. Therefore, the loss function is defined as the negative log-likelihood averaged over all the residue pairs of the training proteins. Since the ratio of contacts among all the residue pairs is very small, to make the training algorithm converge fast, we assign a larger weight to the residue pairs forming a contact. The weight is assigned such that the total weight assigned to contacts is approximately 1/8 of the number of non-contacts in the training set.

**Regularization and optimization.** To prevent overfitting, we employ  $L_2$ -norm regularization to reduce the parameter space. That is, we want to find a set of parameters with a small  $L_2$  norm to minimize the loss function, so the final objective function to be minimized is the sum of loss function and the  $L_2$  norm of the model parameters (multiplied by a regularization factor). We use a stochastic gradient descent algorithm to minimize the objective function. It takes 20-30 epochs (each epoch scans through all the training proteins exactly once) to obtain a very good solution. The whole algorithm is implemented by Theano (Bergstra, et al., 2010) and mainly runs on a GPU card.

## Training and test data

We test our method using some public datasets, including the 150 Pfam families (Jones, et al., 2012), the 105 CASP11 test proteins, 76 recently-released hard CAMEO test proteins (Supplementary Table 1) and 398 membrane proteins (Supplementary Table 2). For the CASP test proteins, we use the official domain definitions, but we do not parse a CAMEO or membrane protein into domains.

Our training set is a subset of PDB25 created in February 2015, in which any two proteins share less than 25% sequence identity. We exclude a protein from the training set if it satisfies one of the following conditions: (i) sequence length smaller than 26 or larger than 700, (ii) resolution worse than 2.5Å, (iii) has domains made up of multiple protein chains, (iv) no DSSP information, and (v) there is inconsistency between its PDB, DSSP and ASTRAL sequences (Drozdetskiy, et al., 2015). Finally, we also exclude the proteins sharing >25% sequence identity or having a BLAST E-value <0.1 with any of

our test proteins. In total there are 6767 proteins in our training set, from which we have trained 7 different models. For each model, we randomly sampled ~6000 proteins from the training set to train the model and used the remaining proteins to validate the model and determine the hyper-parameters (i.e., regularization factor). The final model is the average of these 7 models.

## Protein features

We use similar but fewer protein features as MetaPSICOV. In particular, the input features include protein sequence profile (i.e., position-specific scoring matrix), predicted 3-state secondary structure and 3-state solvent accessibility, direct co-evolutionary information generated by CCMpred, mutual information and pairwise potential (Betancourt and Thirumalai, 1999; Miyazawa and Jernigan, 1985). To derive most features for a protein, we need to generate its MSA (multiple sequence alignment). For a training protein, we run PSI-BLAST (with E-value 0.001 and 3 iterations) to scan through the NR (non-redundant) protein sequence database dated in October 2012 to find its sequence homologs, and then build its MSA and sequence profile and predict other features (i.e., secondary structure and solvent accessibility).

For a test protein, we generate four different MSAs by running HHblits (Remmert, et al., 2012) with 3 iterations and E-value set to 0.001 and 1, respectively, to search through the uniprot20 HMM library released in November 2015 and February 2016. From each individual MSA, we derive one sequence profile and employ our in-house tool RaptorX-Property (Wang, et al., 2016) to predict the secondary structure and solvent accessibility accordingly. That is, for each test protein we generate 4 sets of input features and accordingly 4 different contact predictions. Then we average these 4 predictions to obtain the final contact prediction. This averaged contact prediction is about 1-2% better than that predicted from a single set of features (detailed data not shown). Although currently there are quite a few approaches such as Efold and PSICOV that can generate direct evolutionary coupling information, we only employ CCMpred to do so because it is very fast when running on a GPU card (Seemayer, et al., 2014).

## Programs to compare and evaluation metrics

We compare our method with PSICOV (Jones, et al., 2012), Efold (Marks, et al., 2011), CCMpred (Seemayer, et al., 2014), and MetaPSICOV (Jones, et al., 2015). MetaPSICOV (Jones, et al., 2015) performed the best in CASP11 (Monastyrskyy, et al., 2015). All the programs are run with parameters set according to their respective papers. We evaluate the accuracy of the top  $L/k$  ( $k=10, 5, 2, 1$ ) predicted contacts where  $L$  is protein sequence length (Ma, et al., 2015). The prediction accuracy is defined as the percentage of native contacts among the top  $L/k$  predicted contacts. We also divide contacts into three groups according to the sequence distance of two residues in a contact. That is, a contact is short-, medium- and long-range when its sequence distance falls into  $[6, 11]$ ,  $[12, 23]$ , and  $\geq 24$ , respectively.

## Calculation of Meff

Meff measures the amount of homologous information in an MSA (multiple sequence alignment). It can also be interpreted as the number of non-redundant sequences in an MSA. To calculate the Meff of an MSA, we first calculate the sequence identity between any two protein sequences in the MSA. Let a binary variable  $S_{ij}$  denote the similarity between two protein sequences  $i$  and  $j$ .  $S_{ij}$  is equal to 1 if and only if the sequence identity between  $i$  and  $j$  is at least 70%. For a protein  $i$ , we calculate the sum of  $S_{ij}$  over all the proteins (including itself) in the MSA and denote it as  $S_i$ . Finally, we calculate Meff as the sum of  $1/S_i$  over all the protein sequences in this MSA.

### 3D model construction by contact-assisted folding

We use a similar approach as described in (Adhikari, et al., 2015) to build the 3D models of a test protein by feeding predicted contacts and secondary structure to the Crystallography & NMR System (CNS) suite (Briinger, et al., 1998). We predict secondary structure using our in-house tool RaptorX-Property (Wang, et al., 2016) and then convert it to distance, angle and h-bond restraints using a script in the Confold package (Adhikari, et al., 2015). For each test protein, we choose top L predicted contacts (L is sequence length) no matter whether they are short-, medium- or long-range and then convert them to distance restraints. That is, a pair of residues predicted to form a contact is assumed to have distance between 3.5Å and 8.0 Å. Then, we generate twenty 3D structure models using CNS and select top 5 models by the NOE score yielded by CNS(Briinger, et al., 1998). The NOE score mainly reflects the degree of violation of the model against the input constraints (i.e., predicted secondary structure and contacts). The lower the NOE score, the more likely the model has a higher quality. When CCMpred- and MetaPSICOV-predicted contacts are used to build 3D models, we also use the secondary structure predicted by RaptorX-Property to warrant a fair comparison.

### Template-based modeling (TBM) of the test proteins

To generate template-based models (TBMs) for a test protein, we first run HHblits (with the UniProt20\_2016 library) to generate an HMM file for the test protein, then run HHsearch with this HMM file to search for the best templates among the 6767 training proteins of our deep learning model, and finally run MODELLER to build a TBM from each of the top 5 templates.

### Author contributions

J.X. conceived the project, developed the algorithm and wrote the paper. S.W. did data preparation and analysis and helped with algorithm development and paper writing. S.S. helped with algorithm development and data analysis. R.Z. helped with data analysis. Z.L. helped with algorithm development.

### Acknowledgements

This work is supported by National Institutes of Health grant R01GM089753 to J.X. and National Science Foundation grant DBI-1564955 to J.X. The authors are also grateful to the support of Nvidia Inc. and the computational resources provided by XSEDE.

### References

- Adhikari, B., et al. (2015) CONFOLD: residue - residue contact - guided ab initio protein folding, *Proteins: Structure, Function, and Bioinformatics*, **83**, 1436-1449.
- Bergstra, J., et al. (2010) Theano: A CPU and GPU math compiler in Python. *Proc. 9th Python in Science Conf.* pp. 1-7.
- Betancourt, M.R. and Thirumalai, D. (1999) Pair potentials for protein folding: choice of reference states and sensitivity of predicted native states to variations in the interaction schemes, *Protein Science*, **8**, 361-369.
- Briinger, A.T., et al. (1998) Crystallography & NMR system: A new software suite for macromolecular structure determination, *Acta Crystallogr D Biol Crystallogr*, **54**, 905-921.
- Clark, M.D., et al. (2015) Structural insights into the assembly of the histone deacetylase-associated Sin3L/Rpd3L corepressor complex, *Proceedings of the National Academy of Sciences*, **112**, E3669-E3678.
- Cohen-Dvashi, H., et al. (2015) Molecular mechanism for LAMP1 recognition by Lassa Virus, *Journal*

- of virology, **89**, 7584-7592.
- de Juan, D., Pazos, F. and Valencia, A. (2013) Emerging methods in protein co-evolution, *Nature Reviews Genetics*, **14**, 249-261.
- Di Lena, P., Nagata, K. and Baldi, P. (2012) Deep architectures for protein contact map prediction, *Bioinformatics*, **28**, 2449-2457.
- Drozdetskiy, A., *et al.* (2015) JPred4: a protein secondary structure prediction server, *Nucleic acids research*, gkv332.
- Ekeberg, M., *et al.* (2013) Improved contact prediction in proteins: using pseudolikelihoods to infer Potts models, *Physical Review E*, **87**, 012707.
- Göbel, U., *et al.* (1994) Correlated mutations and residue contacts in proteins, *Proteins: Structure, Function, and Bioinformatics*, **18**, 309-317.
- Haas, J., *et al.* (2013) The Protein Model Portal—a comprehensive resource for protein structure and model information, *Database*, **2013**, bat031.
- He, K., *et al.* (2015) Deep residual learning for image recognition, *arXiv preprint arXiv:1512.03385*.
- Hinton, G., *et al.* (2012) Deep neural networks for acoustic modeling in speech recognition: The shared views of four research groups, *IEEE Signal Processing Magazine*, **29**, 82-97.
- Ioffe, S. and Szegedy, C. (2015) Batch Normalization: Accelerating Deep Network Training by Reducing Internal Covariate Shift. *Proceedings of The 32nd International Conference on Machine Learning*. pp. 448-456.
- Jones, D.T., *et al.* (2012) PSICOV: precise structural contact prediction using sparse inverse covariance estimation on large multiple sequence alignments, *Bioinformatics*, **28**, 184-190.
- Jones, D.T., *et al.* (2015) MetaPSICOV: combining coevolution methods for accurate prediction of contacts and long range hydrogen bonding in proteins, *Bioinformatics*, **31**, 999-1006.
- Kamisetty, H., Ovchinnikov, S. and Baker, D. (2013) Assessing the utility of coevolution-based residue-residue contact predictions in a sequence-and structure-rich era, *Proceedings of the National Academy of Sciences*, **110**, 15674-15679.
- Kim, D.E., *et al.* (2014) One contact for every twelve residues allows robust and accurate topology - level protein structure modeling, *Proteins: Structure, Function, and Bioinformatics*, **82**, 208-218.
- Krizhevsky, A. and Hinton, G. (2010) Convolutional deep belief networks on cifar-10, *Unpublished manuscript*, **40**.
- Krizhevsky, A., Sutskever, I. and Hinton, G.E. (2012) Imagenet classification with deep convolutional neural networks. *Advances in neural information processing systems*. pp. 1097-1105.
- LeCun, Y., Bengio, Y. and Hinton, G. (2015) Deep learning, *Nature*, **521**, 436-444.
- Ma, J., *et al.* (2015) Protein contact prediction by integrating joint evolutionary coupling analysis and supervised learning, *Bioinformatics*, btv472.
- Marks, D.S., *et al.* (2011) Protein 3D structure computed from evolutionary sequence variation, *PloS one*, **6**, e28766.
- Miyazawa, S. and Jernigan, R.L. (1985) Estimation of effective interresidue contact energies from protein crystal structures: quasi-chemical approximation, *Macromolecules*, **18**, 534-552.
- Monastyrskyy, B., *et al.* (2015) New encouraging developments in contact prediction: Assessment of the CASP11 results, *Proteins: Structure, Function, and Bioinformatics*.
- Morcos, F., *et al.* (2011) Direct-coupling analysis of residue coevolution captures native contacts across many protein families, *Proceedings of the National Academy of Sciences*, **108**, E1293-E1301.
- Moult, J., *et al.* (2014) Critical assessment of methods of protein structure prediction (CASP)—round x,

*Proteins: Structure, Function, and Bioinformatics*, **82**, 1-6.

Moult, J., *et al.* (2016) Critical assessment of methods of protein structure prediction: Progress and new directions in round XI, *Proteins: Structure, Function, and Bioinformatics*.

Nair, V. and Hinton, G.E. (2010) Rectified linear units improve restricted boltzmann machines. *Proceedings of the 27th International Conference on Machine Learning (ICML-10)*. pp. 807-814.

Pinheiro, P.H. and Collobert, R. (2014) Recurrent Convolutional Neural Networks for Scene Labeling. *ICML*. pp. 82-90.

Remmert, M., *et al.* (2012) HHblits: lightning-fast iterative protein sequence searching by HMM-HMM alignment, *Nature methods*, **9**, 173-175.

Seemayer, S., Gruber, M. and Söding, J. (2014) CCMpred—fast and precise prediction of protein residue–residue contacts from correlated mutations, *Bioinformatics*, **30**, 3128-3130.

Skwark, M.J., *et al.* (2014) Improved contact predictions using the recognition of protein like contact patterns, *PLoS Comput Biol*, **10**, e1003889.

Srivastava, R.K., Greff, K. and Schmidhuber, J. (2015) Training very deep networks. *Advances in neural information processing systems*. pp. 2377-2385.

Szegedy, C., *et al.* (2015) Going deeper with convolutions. *Proceedings of the IEEE Conference on Computer Vision and Pattern Recognition*. pp. 1-9.

Wang, S., *et al.* (2016) RaptorX-Property: a web server for protein structure property prediction, *Nucleic acids research*, gkw306.

Wang, S., *et al.* (2016) CoinFold: a web server for protein contact prediction and contact-assisted protein folding, *Nucleic acids research*, gkw307.

Wang, S., *et al.* (2013) Protein structure alignment beyond spatial proximity, *Sci Rep*, **3**, 1448.

Wang, Z. and Xu, J. (2013) Predicting protein contact map using evolutionary and physical constraints by integer programming, *Bioinformatics*, **29**, i266-i273.

Wu, S. and Zhang, Y. (2008) A comprehensive assessment of sequence-based and template-based methods for protein contact prediction, *Bioinformatics*, **24**, 924-931.

Xu, J.R. and Zhang, Y. (2010) How significant is a protein structure similarity with TM-score=0.5?, *Bioinformatics*, **26**, 889-895.

Zhang, Y. and Skolnick, J. (2004) Scoring function for automated assessment of protein structure template quality, *Proteins: Structure, Function, and Bioinformatics*, **57**, 702-710.
